# Supplementary material
Source: Copernicus journal article supplement (doi:10.5194/egusphere-2024-580)
Supplement: Supplementary file [file egusphere-2024-580-AC1-supplement.pdf]

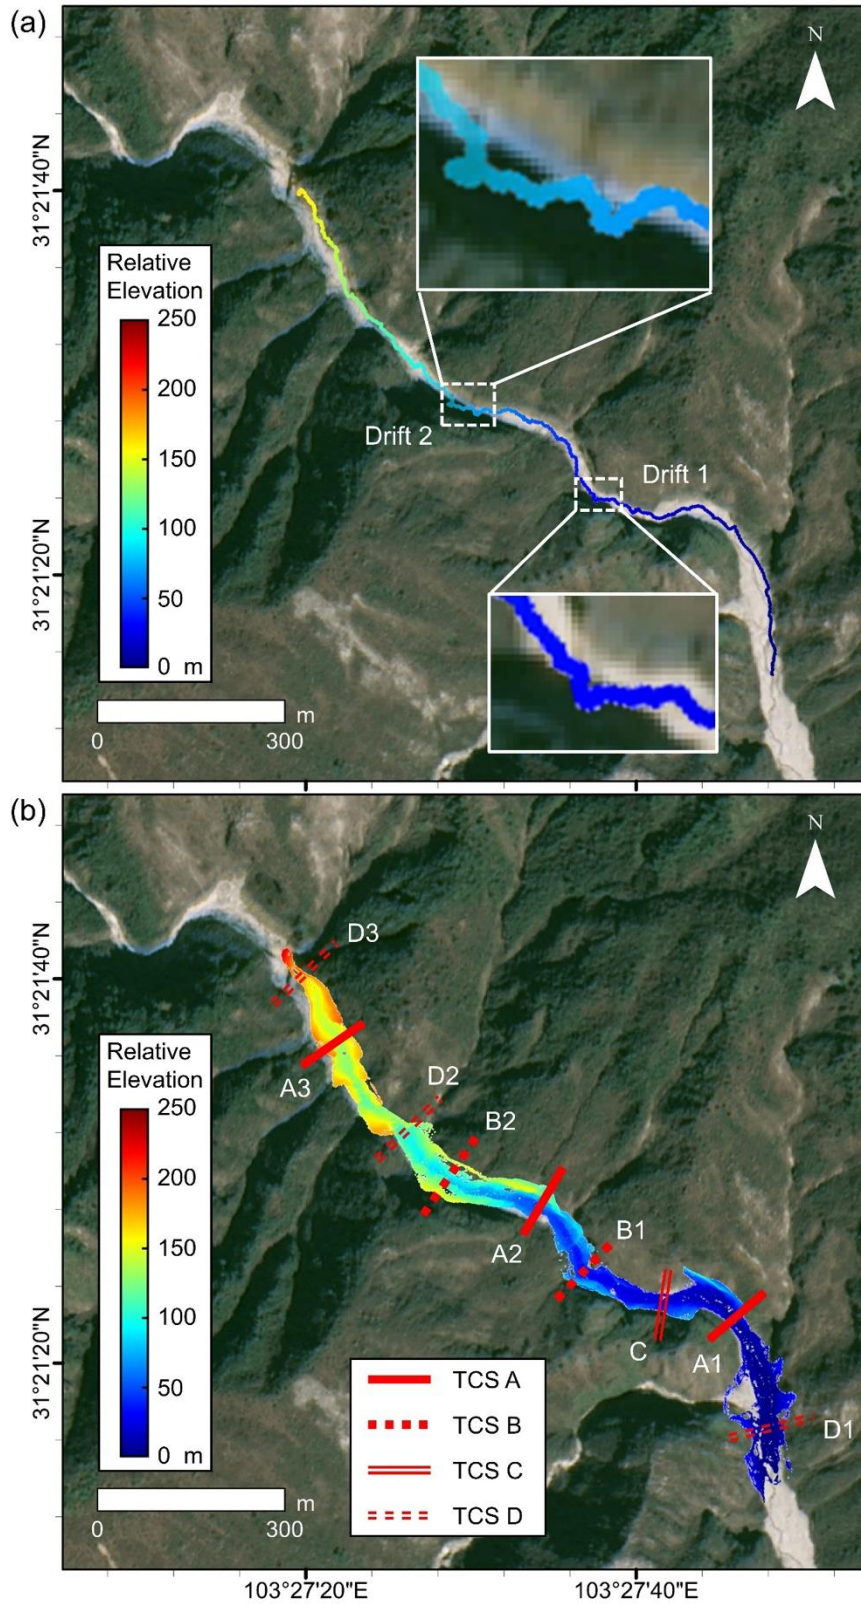

Figure 1. Overview of the AscDAMs map, projected on DOM of ZY03 satellite: (a) The trajectory and (b) the global map, TCS A~D are typical cross sections of the channel.
